**S1 File. Convergence of FIST.**

We follow the convergence analysis in our previous work Li et al. 2019 to show that FIST can converge under the updating rules in Equations (11)-(13).

As the objective function  $\mathcal{J}$  in Equation (3) is bounded from below by zero, we can prove the convergence of FIST by showing that  $\mathcal{J}$  is non-increasing under each of the updating rules in Equations (11)-(13). Here, we only show that  $\mathcal{J}$  is non-increasing under Equation (11). The proof is directly applicable to Equations (12) and (13).

We first expand the derivative in Equation (6) as

$$\frac{\partial \mathcal{J}}{\partial \hat{A}_p} = -X_1 - \hat{A}_p X_2 - W_p \hat{A}_p X_3 + X_4 + \hat{A}_p X_5 + D_p \hat{A}_p X_3,$$

where  $X_1 = (\mathcal{M}_{(1)} \otimes \mathcal{T}_{(1)})(\hat{A}_x \odot \hat{A}_y)$ ,  $X_2 = \lambda(\Phi_x \otimes \Theta_y^W + \Phi_y \otimes \Theta_x^W)$ ,  $X_3 = \lambda(\Phi_x \otimes \Phi_y)$ ,  $X_4 = (\mathcal{M}_{(1)} \otimes \hat{\mathcal{T}}_{(1)})(\hat{A}_x \odot \hat{A}_y)$ , and  $X_5 = \lambda(\Phi_x \otimes \Theta_y^D + \Phi_y \otimes \Theta_x^D)$ .

**Theorem 1.** *Lee and Seung, 2001: A function  $\mathcal{J}(h)$  is non-increasing under the update  $h^* \leftarrow \underset{h}{\operatorname{arg\,min}} G(h, \tilde{h})$  if  $G(h, \tilde{h})$  is an auxiliary function for  $\mathcal{J}(h)$ , such that the following conditions are satisfied:*

$$G(h, \tilde{h}) \geq \mathcal{J}(h), \quad G(h, h) = \mathcal{J}(h).$$

Based on Theorem 1,  $\mathcal{J}$  is non-increasing under the update in Equation (11) if it is an update of one proper auxiliary function of  $\mathcal{J}(\hat{A}_p)$ , which is defined in Theorem 2.

**Theorem 2.** *The following function*

$$G([\hat{A}_p]_{a,b}, [\tilde{A}_p]_{a,b}) = \mathcal{J}([\tilde{A}_p]_{a,b}) + \mathcal{J}'([\tilde{A}_p]_{a,b})([\hat{A}_p]_{a,b} - [\tilde{A}_p]_{a,b}) + \frac{[X_4 + \tilde{A}_p X_5 + D_p \tilde{A}_p X_3]_{a,b}}{2[\tilde{A}_p]_{a,b}}([\hat{A}_p]_{a,b} - [\tilde{A}_p]_{a,b})^2 \quad (1)$$

*is an auxiliary function of  $\mathcal{J}([\hat{A}_p]_{a,b})$  and has its global minimum.*

Proof: First, it is obvious that  $G([\hat{A}_p]_{a,b}, [\hat{A}_p]_{a,b}) = \mathcal{J}([\hat{A}_p]_{a,b})$ . To show  $G([\hat{A}_p]_{a,b}, [\tilde{A}_p]_{a,b}) \geq \mathcal{J}([\hat{A}_p]_{a,b})$  we obtain the second-order Taylor expansion of  $\mathcal{J}([\hat{A}_p]_{a,b})$  at the point  $[\tilde{A}_p]_{a,b}$  as

$$\begin{aligned} \mathcal{J}([\hat{A}_p]_{a,b}) &= \mathcal{J}([\tilde{A}_p]_{a,b}) + \mathcal{J}'([\tilde{A}_p]_{a,b})([\hat{A}_p]_{a,b} - [\tilde{A}_p]_{a,b}) \\ &\quad + \frac{1}{2} \mathcal{J}''([\tilde{A}_p]_{a,b})([\hat{A}_p]_{a,b} - [\tilde{A}_p]_{a,b})^2, \end{aligned}$$

with the second-order derivative given below:

$$\mathcal{J}''([\tilde{A}_p]_{a,b}) = -[X_2]_{b,b} - [W_p]_{a,a}[X_3]_{b,b} + [X_5]_{b,b} + [D_p]_{a,a}[X_3]_{b,b}$$

Thus, the inequality  $G([\hat{A}_p]_{a,b}, [\tilde{A}_p]_{a,b}) \geq \mathcal{J}([\hat{A}_p]_{a,b})$  holds if

$$\frac{[X_4 + \tilde{A}_p X_5 + D_p \tilde{A}_p X_3]_{a,b}}{[\tilde{A}_p]_{a,b}} \geq \mathcal{J}''([\tilde{A}_p]_{a,b}),$$

which can be demonstrated by the facts that

$$[D_p \tilde{A}_p X_3]_{a,b} = \sum_{l,m} [D_p]_{a,l} [\tilde{A}_p]_{l,m} [X_3]_{m,b} \geq [D_p]_{a,a} [X_3]_{b,b} [\tilde{A}_p]_{a,b},$$

$$\text{and } [\tilde{A}_p X_5]_{a,b} = \sum_l [\tilde{A}_p]_{a,l} [X_5]_{l,b} \geq [X_5]_{b,b} [\tilde{A}_p]_{a,b}. \quad (\text{End of Proof})$$

As the *auxiliary function*  $G([\hat{A}_p]_{a,b}, [\tilde{A}_p]_{a,b})$  in Equation (1) is a quadratic function on variable  $[\hat{A}_p]_{a,b}$ , its minimum can be easily obtained in a closed-form as

$$\begin{aligned} [\hat{A}_p]_{a,b}^* &= \arg \min_{[\hat{A}_p]_{a,b}} G([\hat{A}_p]_{a,b}, [\tilde{A}_p]_{a,b}) \\ &= \frac{[\tilde{A}_p]_{a,b} [X_1 + \tilde{A}_p X_2 + W_p \tilde{A}_p X_3]_{a,b}}{[X_4 + \tilde{A}_p X_5 + D_p \tilde{A}_p X_3]_{a,b}}, \end{aligned}$$

which leads to the updating rule in Equation (11).

To analyze the optimality of the fixed point after convergence, we first define  $\{\Lambda_p \in \mathbb{R}^{n_p \times r}, \Lambda_x \in \mathbb{R}^{n_x \times r}, \Lambda_y \in \mathbb{R}^{n_y \times r}\}$  to be the matrices of Lagrange multipliers with the Lagrange function

$$\mathcal{L} = \mathcal{J} - \sum_{i \in \{p, x, y\}} \text{tr}(\Lambda_i \hat{A}_i^T).$$

Setting  $\frac{\partial \mathcal{L}}{\partial \hat{A}_p}$  to be zero, we obtain  $\Lambda_p = \frac{\partial \mathcal{J}}{\partial \hat{A}_p}$ . Furthermore, when  $A^{(i)}$  is a fixed point under the updating in Equation (??) we have

$$[-X_1 - \hat{A}_p X_2 - W_p \hat{A}_p X_3 + X_4 + \hat{A}_p X_5 + D_p \hat{A}_p X_3]_{a,b} [\hat{A}_p]_{a,b} = 0,$$

which implies the KKT complementary slackness condition  $[\Lambda_p]_{a,b} [\hat{A}_p]_{a,b} = 0$  is satisfied.
